# Supplementary material
Source: publisher figshare collection journal article supplement (https://rs.figshare.com/ndownloader/files/12715160)
Supplement: Supplementary file 1 [file 12715160]

Supplementary information for

**Cuticle network and orientation preference of photonic crystals in the scales of the weevil *Lamprocyphus augustus***

R. Ebihara<sup>1</sup>, H. Hashimoto<sup>2</sup>, J. Kano<sup>3</sup>, T. Fujii<sup>3</sup>, S. Yoshioka<sup>1</sup>

1 Department of Physics, Faculty of Science and Technology,  
Tokyo University of Science, 2641 Yamazaki, Noda 278-8510,  
Japan

2 Department of Applied Chemistry, School of Advanced  
Engineering, Kogakuin University,  
2665-1 Nakano, Hachioji, Tokyo 192-0015, Japan

3 Graduate School of Natural Science and Technology,  
Okayama University, Okayama 700-8530, Japan

E-mail address of S.Y.: syoshi@rs.tus.ac.jp

S1.wmv (movie)

Comparison of the unit cell structure between the theory (left) and experiment (right).

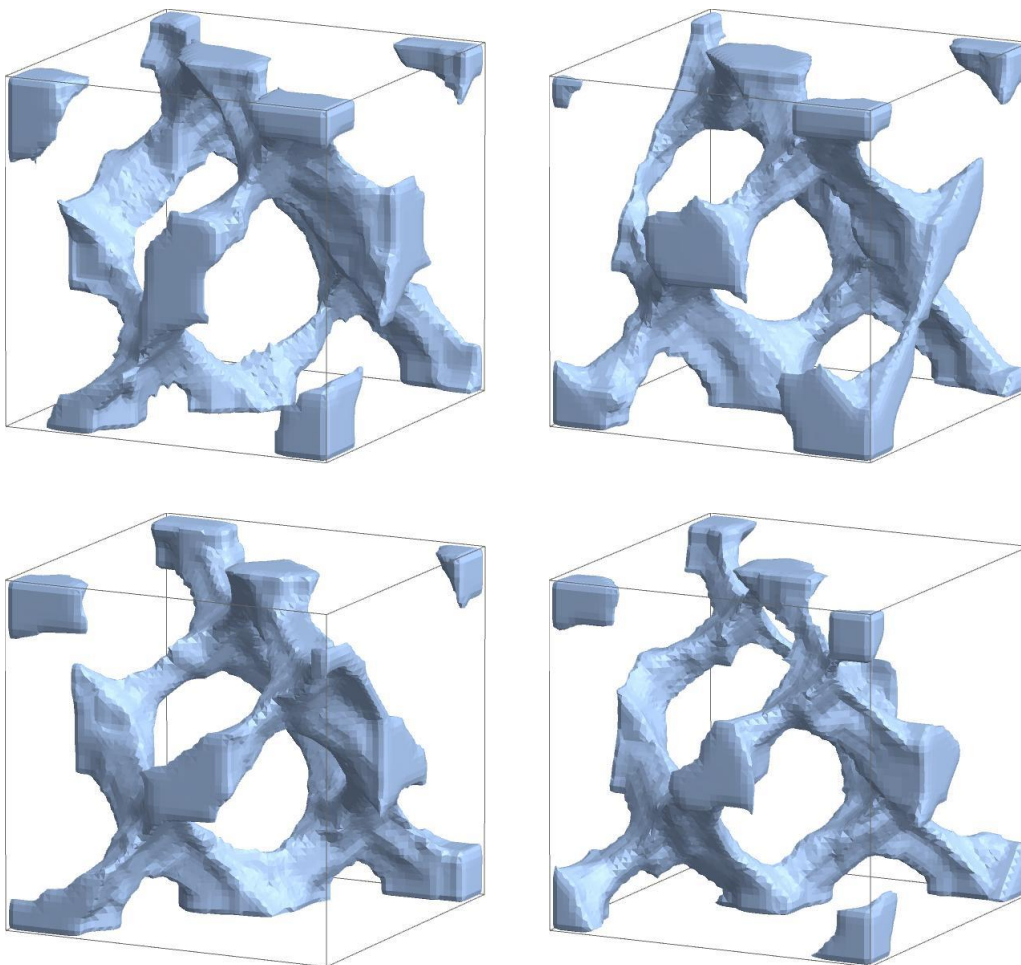

Figure S2 Four examples of the cubic unit cell taken out from the reconstructed 3-dimensional structure. Their positions are shifted by primitive translational vectors from the cell shown in Fig. 7(a).
